# Supplementary material for: The p53-p21 axis plays a central role in lymphatic homeostasis and disease
Source: bioRxiv or medRxiv preprint supplement (doi:10.1101/2020.03.18.992784), 2021-10-23
Supplement: Supplementary file [file media-1.pdf]

## Supplemental Figures/Tables

**Supplemental Table 1: *Rpl27a*<sup>low/+</sup>:*Mdm2*<sup>+/-</sup> (RP27M2) was not observed post-E16.5 from *Rpl27a*<sup>low/+</sup> x *Mdm2*<sup>+/-</sup> crosses**

| Gestational Age | N   | WT (%)   |            | <i>Rpl27a</i> <sup>low/+</sup> (%) |            | <i>Mdm2</i> <sup>+/-</sup> (%) |            | <i>Rpl27a</i> <sup>low/+</sup> : <i>Mdm2</i> <sup>+/-</sup> (%) |            |
|-----------------|-----|----------|------------|------------------------------------|------------|--------------------------------|------------|-----------------------------------------------------------------|------------|
|                 |     | Observed | Expected   | Observed                           | Expected   | Observed                       | Expected   | Observed                                                        | Expected   |
| 11.5            | 24  | 7 (29)   | 6 (25)     | 8 (33)                             | 6 (25)     | 6 (25)                         | 6 (25)     | 3 (13)                                                          | 6 (25)     |
| 12.5            | 31  | 1 (3)    | 7.75 (25)  | 12 (39)                            | 7.75 (25)  | 10 (32)                        | 7.75 (25)  | 8 (26)                                                          | 7.75 (25)  |
| 13.5            | 89  | 34 (38)  | 22.25 (25) | 19 (21)                            | 22.25 (25) | 14 (16)                        | 22.25 (25) | 22 (25)                                                         | 22.25 (25) |
| 14.5            | 147 | 37 (25)  | 36.75 (25) | 39 (27)                            | 36.75 (25) | 34 (23)                        | 36.75 (25) | 37 (25)                                                         | 36.75 (25) |
| 15.5            | 80  | 18 (23)  | 20 (25)    | 24 (30)                            | 20 (25)    | 17 (22)                        | 20 (25)    | 21 (25)                                                         | 20 (25)    |
| 16.5            | 54  | 15 (28)  | 13.5 (25)  | 15 (28)                            | 13.5 (25)  | 12 (22)                        | 13.5 (25)  | 12 (22)                                                         | 13.5 (25)  |
| 18.5            | 12  | 1 (8)    | 3 (25)     | 5 (42)                             | 3 (25)     | 6 (50)                         | 3 (25)     | 0 (0)                                                           | 3 (25)     |
| P28             | 100 | 34 (34)  | 25 (25)    | 32 (32)                            | 25 (25)    | 34 (34)                        | 25 (25)    | 0 (0)                                                           | 25 (25)    |

**Supplemental Table 2: *Rpl27a*<sup>low/+</sup>:*Mdm4*<sup>+/-</sup> (RP27M4) was not observed post-E16.5 from *Rpl27a*<sup>low/+</sup> x *Mdm4*<sup>+/-</sup> crosses**

| Gestational Age | N   | WT (%)   |            | <i>Rpl27a</i> <sup>low/+</sup> (%) |            | <i>Mdm4</i> <sup>+/-</sup> (%) |            | <i>Rpl27a</i> <sup>low/+</sup> : <i>Mdm4</i> <sup>+/-</sup> (%) |            |
|-----------------|-----|----------|------------|------------------------------------|------------|--------------------------------|------------|-----------------------------------------------------------------|------------|
|                 |     | Observed | Expected   | Observed                           | Expected   | Observed                       | Expected   | Observed                                                        | Expected   |
| 11.5            | 18  | 3 (17)   | 4.5 (25)   | 6 (33)                             | 4.5 (25)   | 4 (22)                         | 4.5 (25)   | 5 (28)                                                          | 4.5 (25)   |
| 12.5            | 54  | 18 (33)  | 13.5 (25)  | 9 (17)                             | 13.5 (25)  | 14 (26)                        | 13.5 (25)  | 13 (24)                                                         | 13.5 (25)  |
| 13.5            | 143 | 40 (28)  | 35.75 (25) | 32 (22)                            | 35.75 (25) | 41 (29)                        | 35.75 (25) | 30 (21)                                                         | 35.75 (25) |
| 14.5            | 172 | 48 (28)  | 43 (25)    | 36 (21)                            | 43 (25)    | 46 (27)                        | 43 (25)    | 42 (24)                                                         | 43 (25)    |
| 15.5            | 83  | 22 (27)  | 20.75 (25) | 24 (29)                            | 20.75 (25) | 22 (27)                        | 20.75 (25) | 15 (17)                                                         | 20.75 (25) |
| 16.5            | 30  | 7 (23)   | 7.5 (25)   | 9 (30)                             | 7.5 (25)   | 9 (30)                         | 7.5 (25)   | 5 (17)                                                          | 7.5 (25)   |
| 18.5            | 9   | 6 (66)   | 2.25 (25)  | 3 (34)                             | 2.25 (25)  | 0 (0)                          | 2.25 (25)  | 0 (0)                                                           | 2.25 (25)  |
| P28             | 48  | 16 (33)  | 12 (25)    | 15 (31)                            | 12 (25)    | 17 (36)                        | 12 (25)    | 0 (0)                                                           | 12 (25)    |

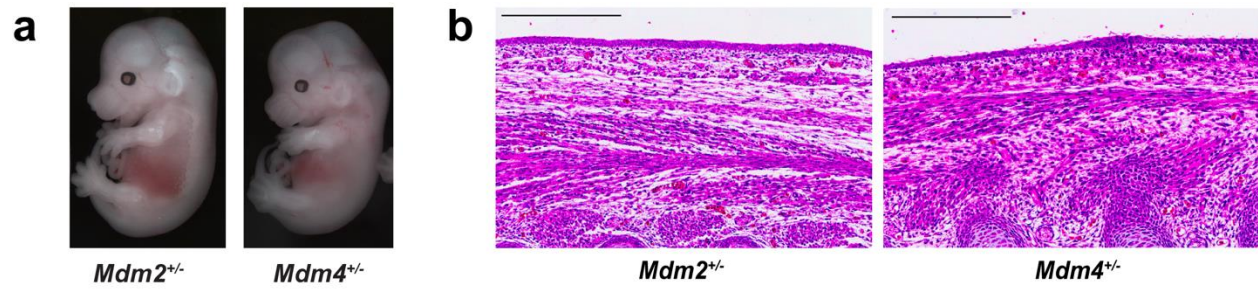

**Supplemental Figure 1.** E14.5 *Mdm2<sup>+/-</sup>* and *Mdm4<sup>+/-</sup>* embryos are normal. **a)** Representative image taken with Leica M165 FC stereoscope. **b)** H&E staining of dorsal skin. Scale bar represents 300  $\mu$ m.

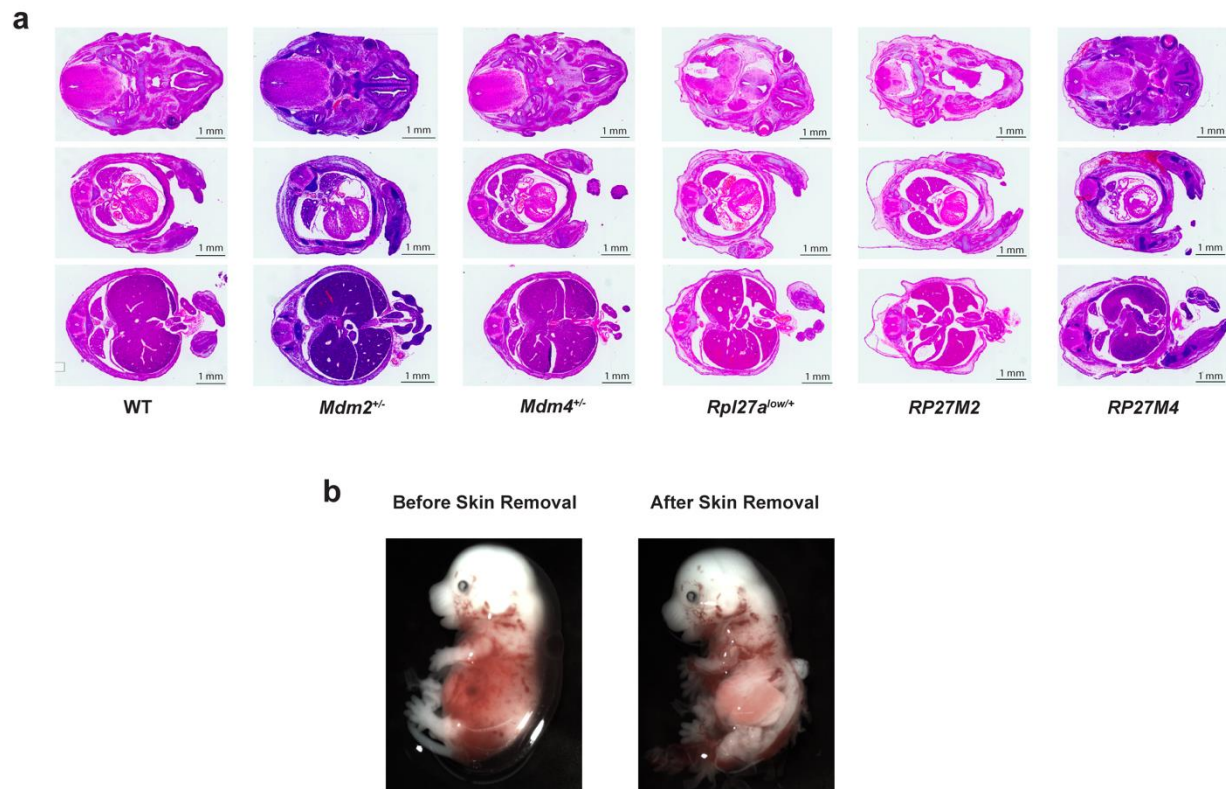

**Supplemental Figure 2.** Major organs in mutant embryos are normal. **a)** H&E staining of E15.5 embryos. **b)** Picture of a mutant embryo before and after skin removal showing a clear view of the liver and no internal hemorrhaging.

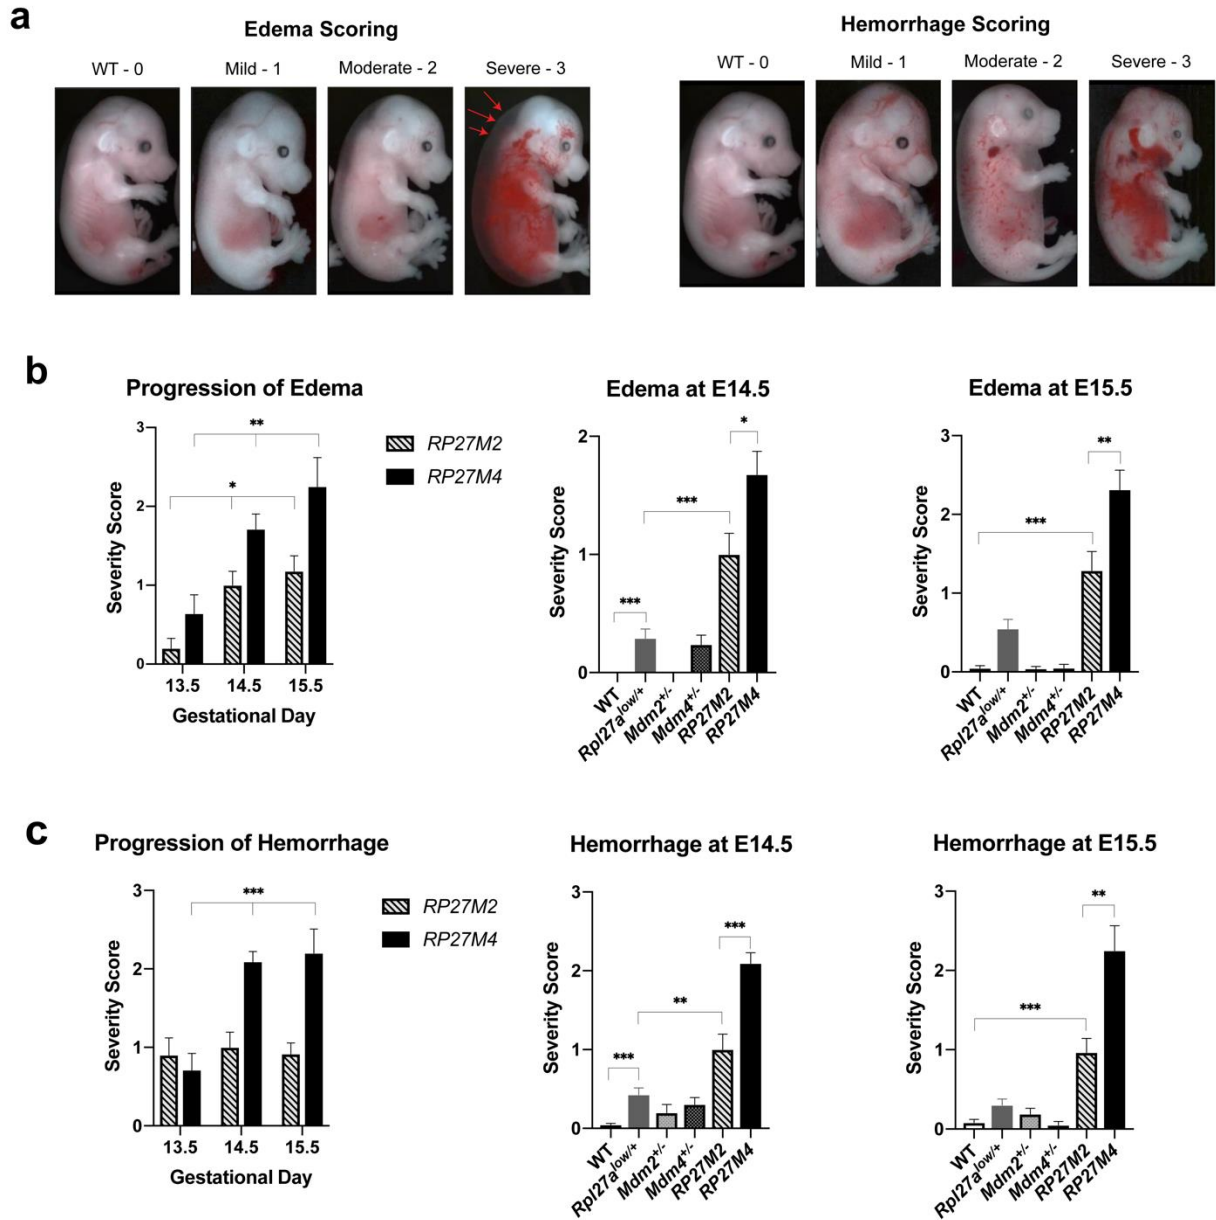

**Supplemental Figure 3.** Edema and cutaneous hemorrhaging are progressive and more severe in *RP27M4*. **a)** Edema (red arrows) and hemorrhaging scoring criteria used by three researchers during evaluation to avoid bias. **b)** Severity scoring of edema by gestational age. **c)** Severity of hemorrhaging by gestational age. Sample sizes for (a) and (b) are at E13.5: 10 *RP27M2* and 14 *RP27M4*; at E14.5: 38 WT, 42 *Rpl27a<sup>low/+</sup>*, 25 *Mdm2<sup>+/-</sup>*, 36 *Mdm4<sup>+/-</sup>*, 32 *RP27M2*, and 38 *RP27M4*; at E15.5: 31 WT, 33 *Rpl27a<sup>low/+</sup>*, 14 *Mdm2<sup>+/-</sup>*, 19 *Mdm4<sup>+/-</sup>*, 30 *RP27M2*, and 10 *RP27M4* embryos. Statistical significance determined by one-way ANOVA (for the first panels of a & b) and *t* tests. NS= not significant, \*  $p < 0.05$ , \*\*  $p < 0.01$ , and \*\*\*  $p < 0.001$ .





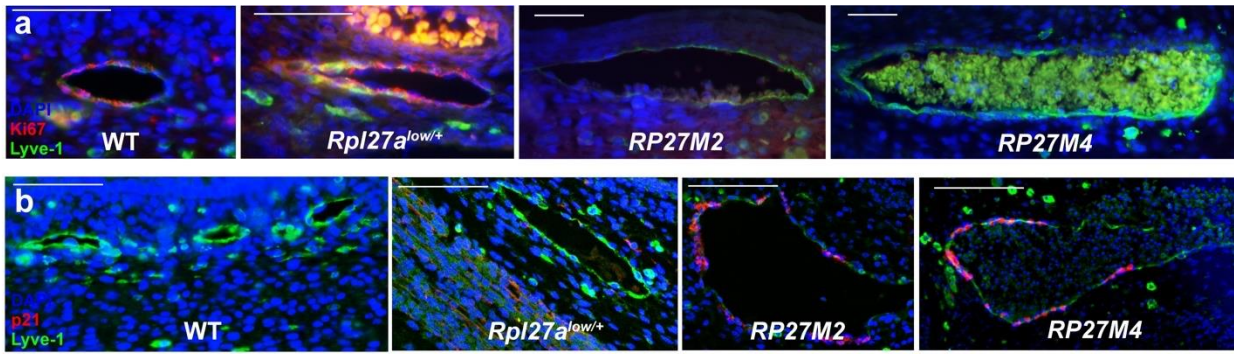

**Supplemental Figure 5.** Immunofluorescence staining of E15.5 lymphatic vessels **a)** Dorsal skin double stained with Ki-67 and Lyve-1. Magnification 40X for WT and *Rpl27a*<sup>low/+</sup>, 20X for *RP27M2* and *RP27M4*. **b)** p21 expression in lymphatic endothelium. Data are representative of more than four biological samples per genotype. Scale bars are 100μm for **b** and 50μm for **a**.

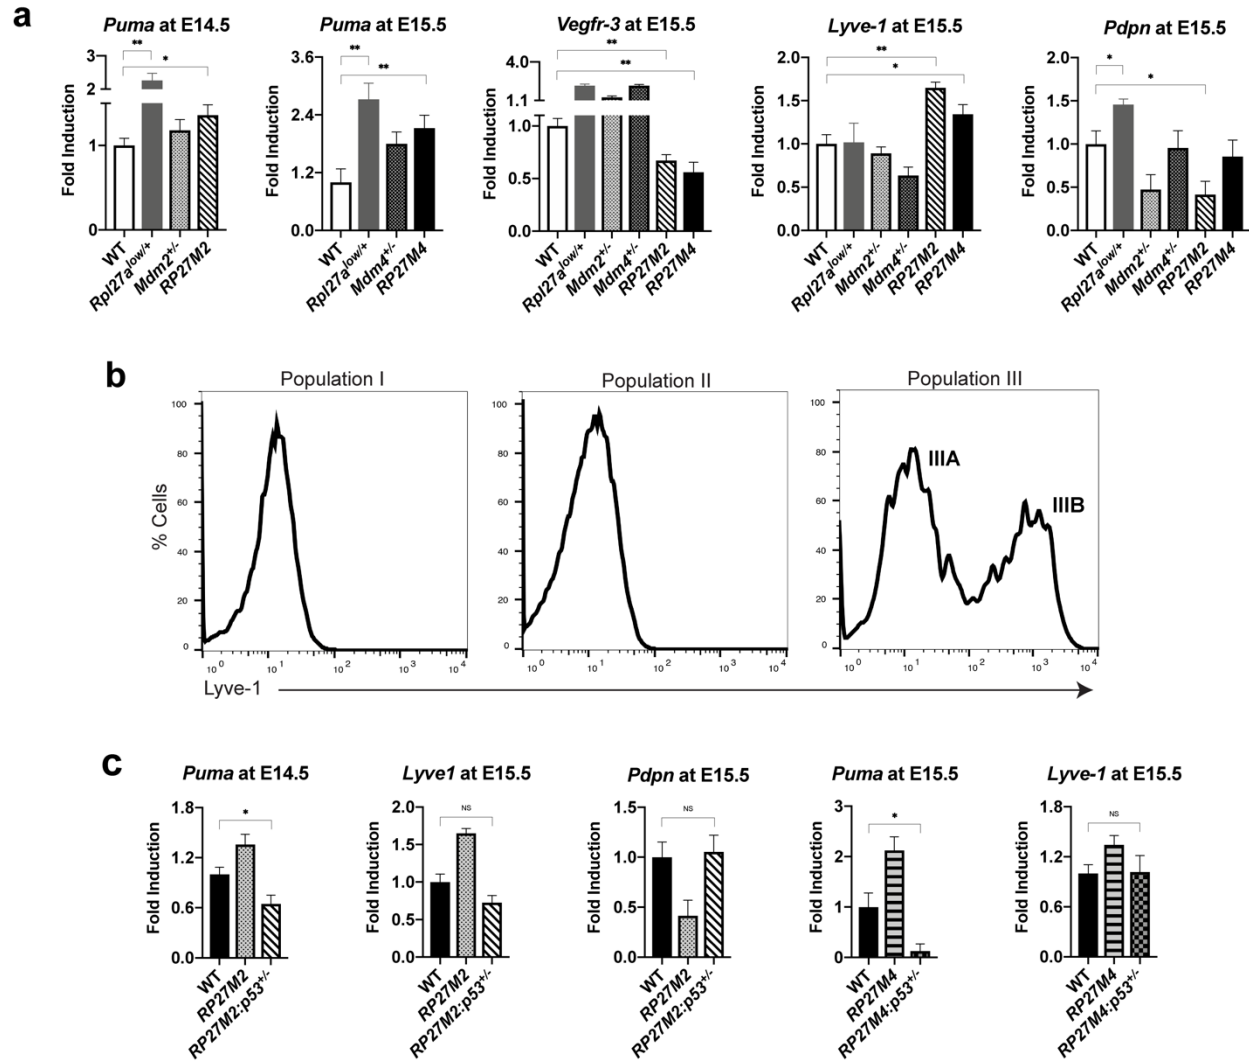

**Supplemental Figure 6.** Gene Expression differences and CD31<sup>+</sup> cell distributions are rescued by the loss of one functional *p53* copy. **a)** Gene expression assays by qPCR (mean  $\pm$  SEM) in *RP27M2* and *RP27M4* skin. **b)** Representative lyve-1 expression plot of the four CD31<sup>+</sup> cell populations in WT mice. **c)** Gene expression assays by qPCR (mean  $\pm$  SEM) in *RP27M2;p53*<sup>+/-</sup> and *RP27M4;p53*<sup>+/-</sup> skin show restoration to WT levels.



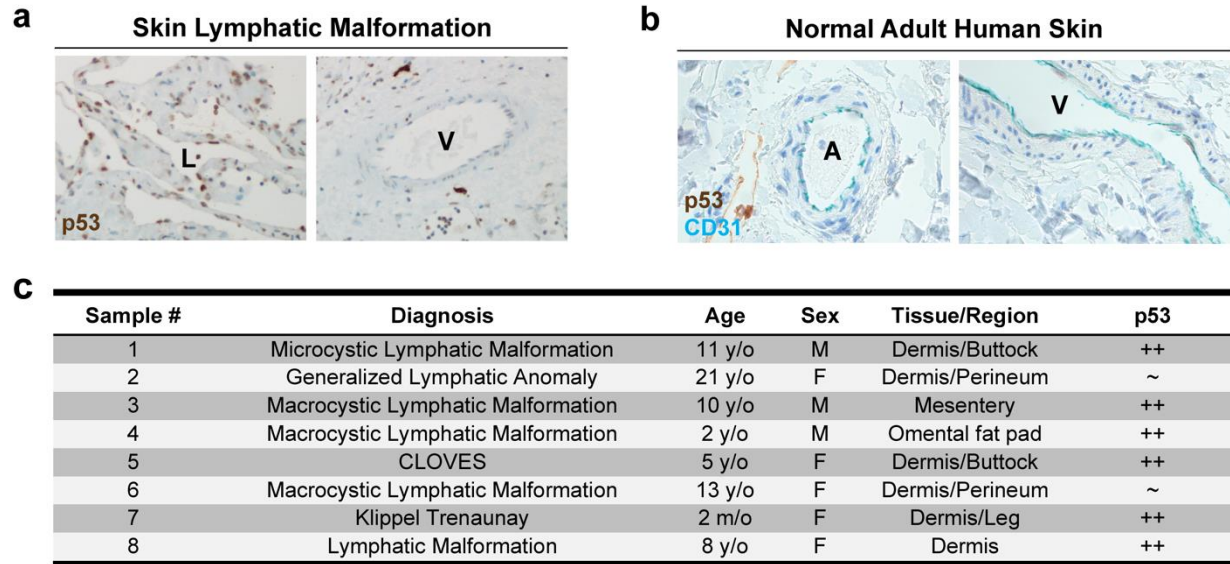

**Supplemental Figure 7.** Lymphatic endothelium is positive for p53 in majority of human lymphatic diseases. **a)** p53 IHC staining of lymphatic endothelium (L), artery (A), or vein (V) in pediatric lymphedema specimen and **b)** normal human skin. **c)** 6 out of 8 human lymphatic cases are highly positive for p53.
